# Supplementary material
Source: MDPI journal article supplement (https://www.mdpi.com/2073-4395/9/1/34)
Supplement: s1 [file s1]

## Supplementary Files

**Table S1.** Yields (t ha<sup>-1</sup>) of apple (*Malus pumila*) and crops in alley cropping and sole crops in Exp.2 (2014). The crop yields in alley cropping systems were expressed per unit of crop area.

| Species | Cropping System        | Year after Establishment |             |             |             |             |             |             |             |             |
|---------|------------------------|--------------------------|-------------|-------------|-------------|-------------|-------------|-------------|-------------|-------------|
|         |                        | First                    | Second      | Third       | Fourth      | Fifth       | Sixth       | Seventh     | Eighth      | Ninth       |
| Peanut  | Mono                   | 3.20±0.10a               | 3.20±0.10a  | 3.20±0.10a  | 3.20±0.10a  | 3.20±0.10a  | 3.20±0.10a  | 3.20±0.10a  | 3.20±0.10a  | 3.20±0.10a  |
|         | Inter                  | 3.17±0.09a               | 3.10±0.11a  | 3.14±0.07a  | 3.04±0.05a  | 3.08±0.04a  | 3.02±0.05a  | 2.89±0.01a  | 2.54±0.03b  | 2.70±0.01b  |
| Millet  | Mono                   | 3.38±0.10a               | 3.38±0.10a  | 3.38±0.10a  | 3.38±0.10a  | 3.38±0.10a  | 3.38±0.10a  | 3.38±0.10a  | 3.38±0.10a  | 3.38±0.10a  |
|         | Inter                  | 3.26±0.09a               | 3.22±0.05a  | 3.28±0.11a  | 3.22±0.05a  | 3.25±0.07a  | 3.11±0.04a  | 2.89±0.00b  | 2.64±0.02b  | 2.23±0.02b  |
| Maize   | Mono                   | 11.71±0.66a              | 11.71±0.66a | 11.71±0.66a | 11.71±0.66a | 11.71±0.66a | 11.71±0.66a | 11.71±0.66a | 11.71±0.66a | --          |
|         | Inter                  | 11.36±0.55a              | 11.41±0.53a | 11.26±0.47a | 11.14±0.32a | 10.94±0.29a | 10.41±0.12a | 9.24±0.07b  | 6.57±0.06b  | --          |
| Apple   | Mono                   | --                       | --          | --          | --          | --          | 2.71±0.15a  | 3.88±0.20a  | 8.22±0.37a  | 14.19±0.35a |
|         | Associated with Peanut | --                       | --          | --          | --          | --          | 2.63±0.16a  | 3.80±0.20a  | 8.03±0.39a  | 14.04±0.33a |
|         | Associated with Millet | --                       | --          | --          | --          | --          | 2.58±0.16a  | 3.75±0.19a  | 7.88±0.42a  | 13.87±0.33a |
|         | Associated with Maize  | --                       | --          | --          | --          | --          | 2.54±0.18a  | 3.64±0.21a  | 7.85±0.47a  | 13.87±0.34a |

Mono means the crop or apple in the monoculture; Inter means the crop in the alley cropping. Same small letter indicates no significantly difference between monoculture and alley cropping systems, among apple plantation systems at  $p = 0.05$ .
